# Supplementary material for: Primary Colorectal Tumor Displays Differential Genomic Expression Profiles Associated with Hepatic and Peritoneal Metastases
Source: MDPI journal article supplement (doi:10.3390/cancers15174418), 2023-09-04
Supplement: s1 [file s1]

## **Supplementary Figures and Tables**

Supplementary Figure S1. Disease free survival (right-sided) and Overall (left-sided) survivals curves according to expression of ACE2 (a), CLDN18 (b) and DUSP4 (c) protein in primary tumor samples.

Supplementary Figure S2. Representative gene sets enriched in CRC-Peritoneum (a) and CRC-Liver (b) groups

Supplementary Figure S3. Pathological and genomic data associate to the CRC-Peritoneum signature in TCGA Firehose cohort: (a) Lymphovascular and vascular invasion rates (Chi square test); (b) OncoTree tumor classification system (Chi square test)

Supplementary Table S1. Differential expressed genes found between CRC with LM and CRC with PM identified by LIMMA algorithm

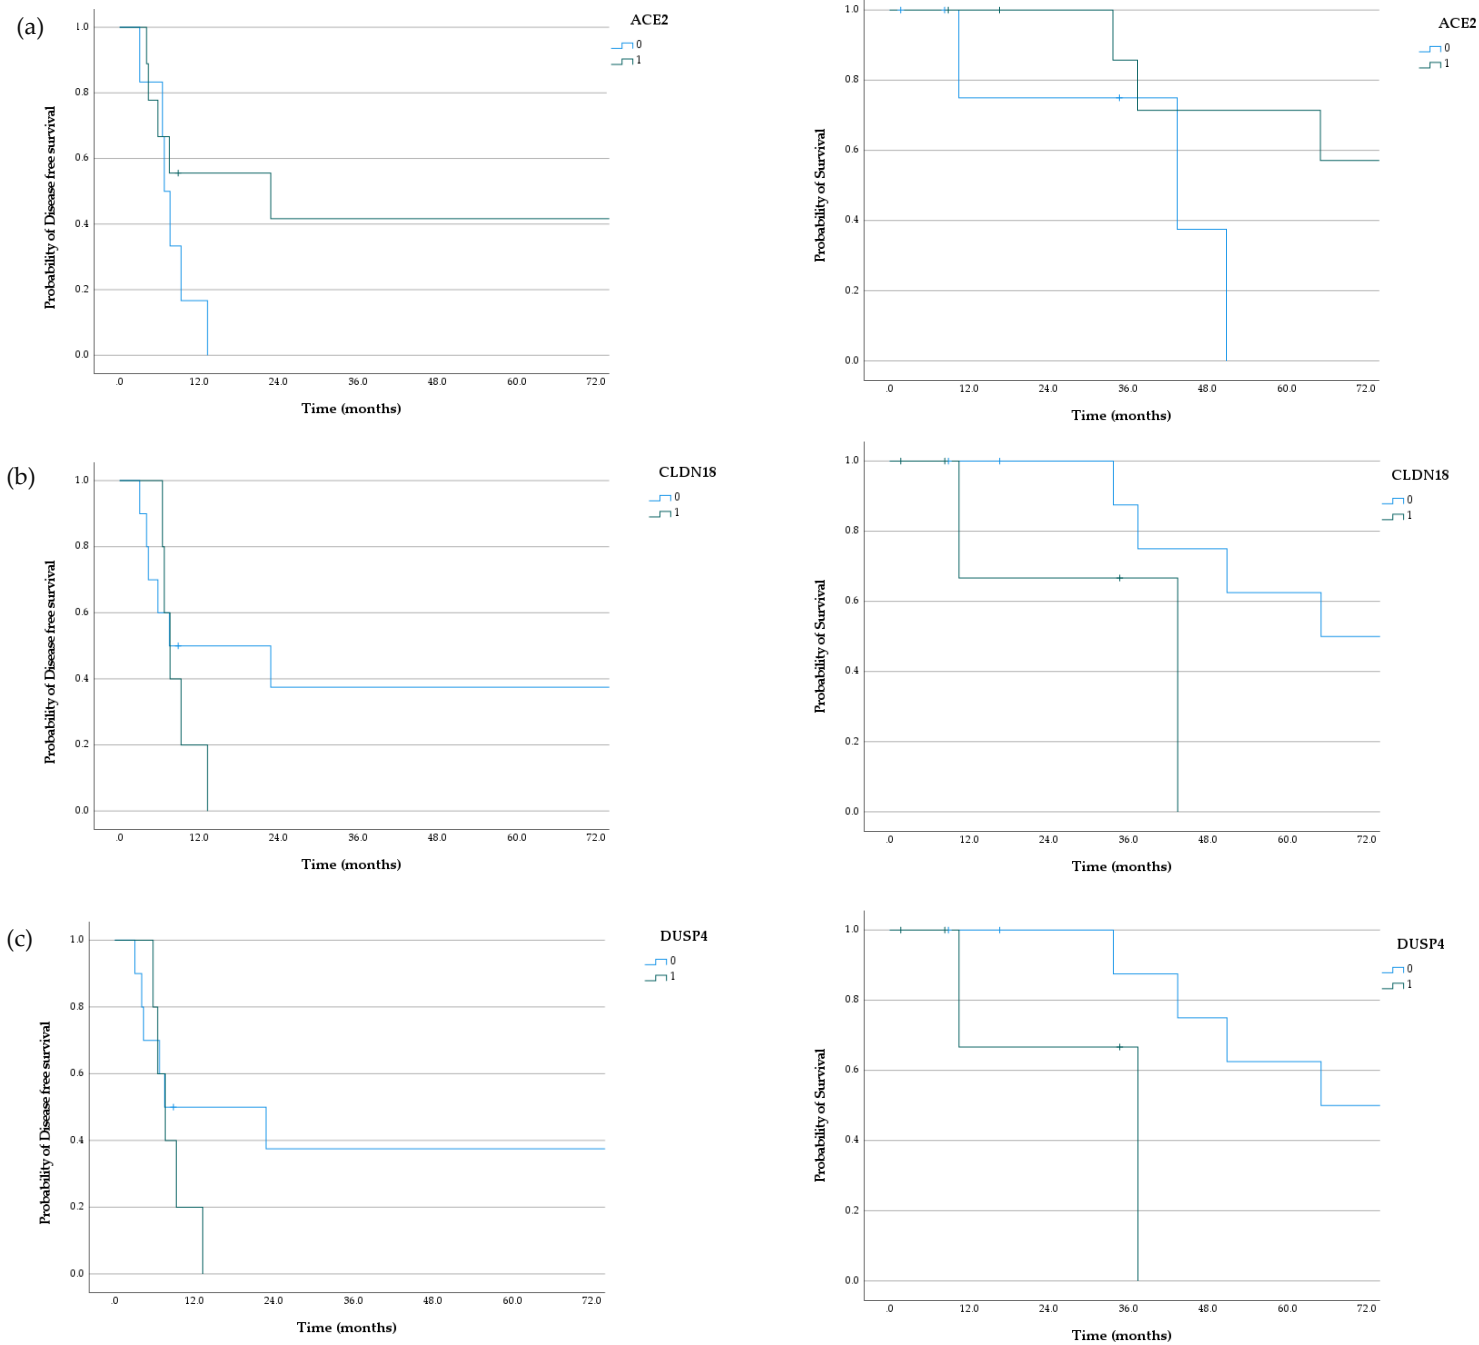

**Supplementary Figure S1.** Disease free survival (right-sided) and Overall (left-sided) survivals curves according to expression of ACE2 (a), CLDN18 (b) and DUSP4 (c) protein in primary tumor samples.

(a)

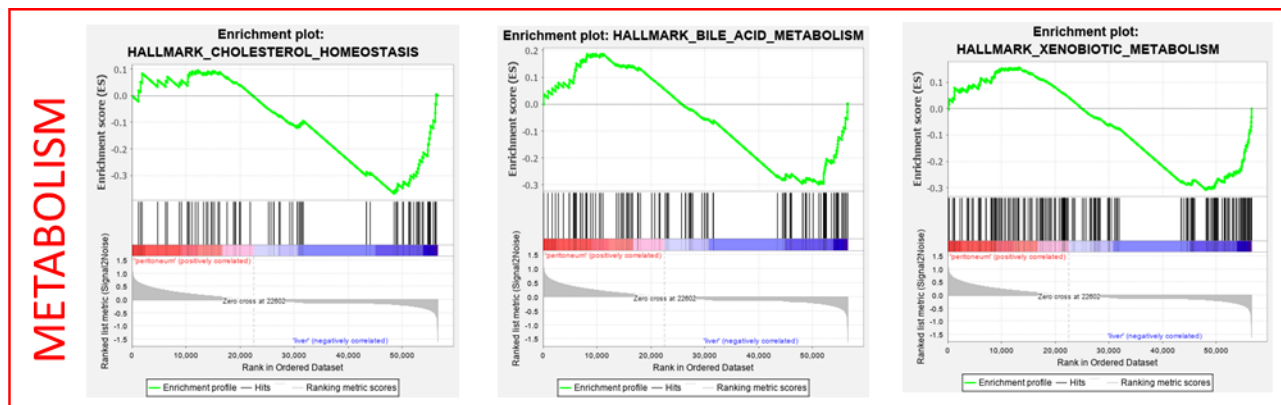**MYC.TARGETS**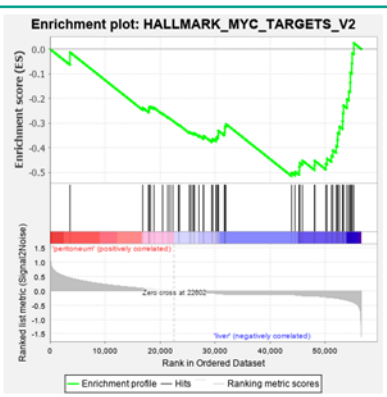**STRESS**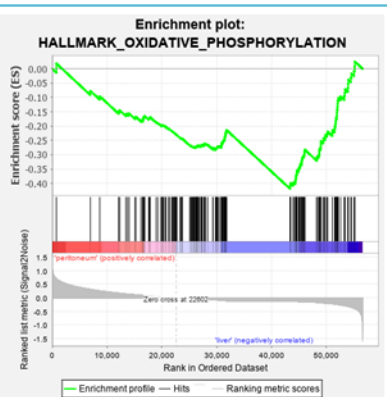**TRANSCRIPTION**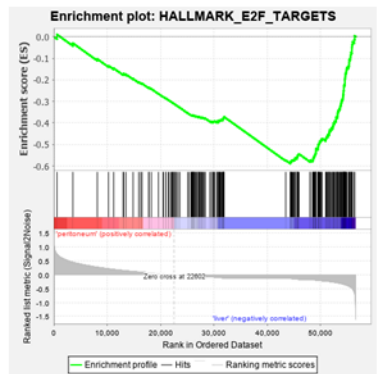

(b)

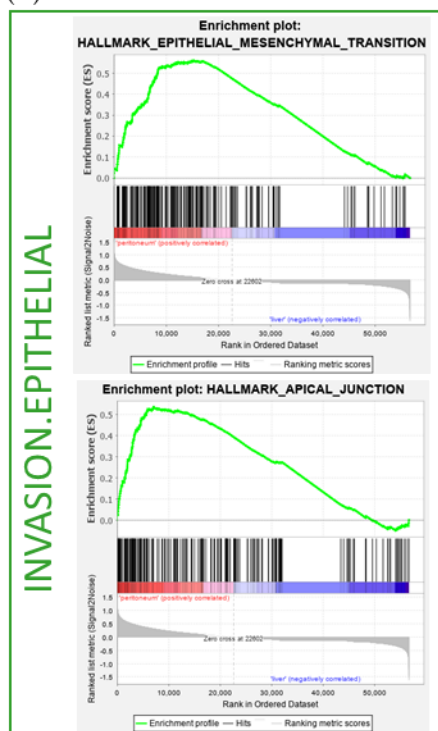**STEM.CELL**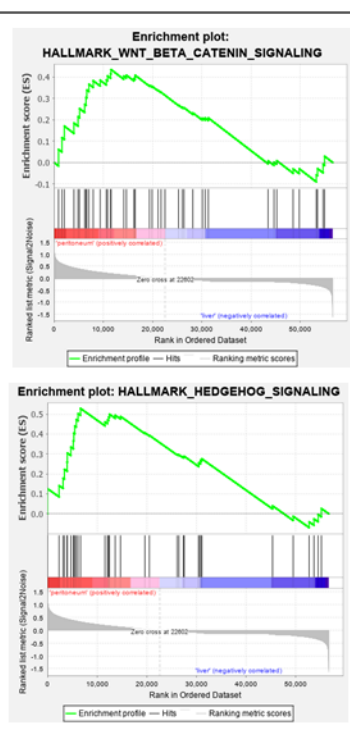**IMMUNE**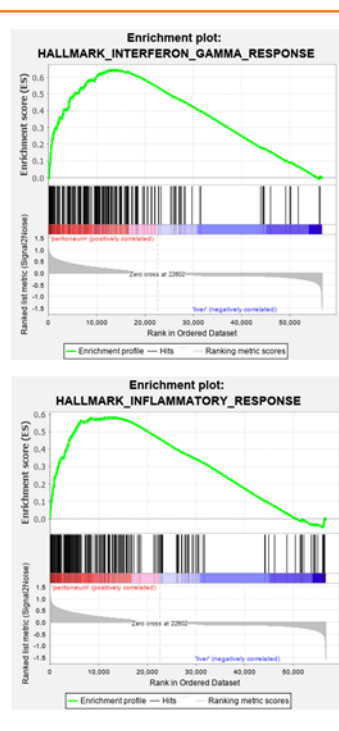**CANCER**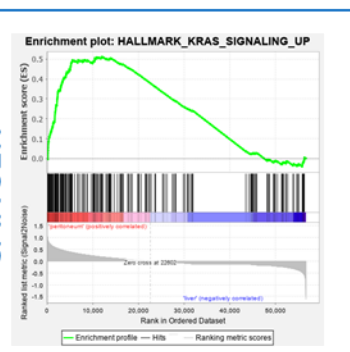

Supplementary Figure S2. Representative gene sets enriched in CRC-Liver (a) and CRC-Peritoneum (b) groups.

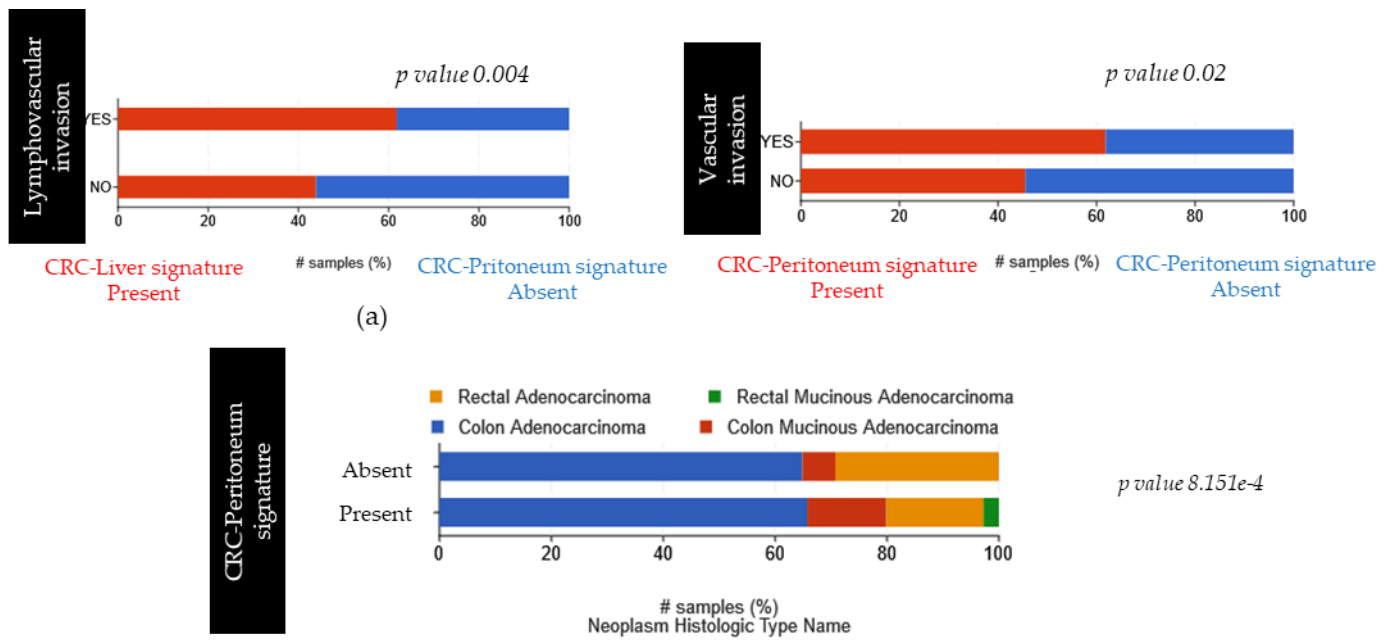

**Supplementary Figure S3. Pathological and genomic data associate to the CRC-Peritoneum signature in TCGA Firehose cohort:** (a) Lymphovascular and vascular invasion rates (Chi square test); (b) OncoTree tumor classification system (Chi square test)

**Supplementary Table S1. Differential expressed genes found between CRC with LM and CRC with PM identified by LIMMA algorithm:** respective significant genes are presented by their up regulation by class of metastasis, for each respective genes LIMMA output statistics are presented in different columns: logFC : logarithm 2 of fold change, AveExp : average expression, t statistics, raw p-values, False Discovery Rate adjusted p-values, and Bayes B statistics

| Genes       | logFC  | AveExpr | t      | P.Value | adj.P.Val | B     |
|-------------|--------|---------|--------|---------|-----------|-------|
| PLA2G12B    | -5,615 | -0,65   | -6,716 | 0,00000 | 0,002770  | 6,603 |
| CLDN18      | 4,891  | -1,424  | 6,534  | 0,00000 | 0,002770  | 6,185 |
| AC034229.2  | 4,57   | -5,115  | 6,354  | 0,00000 | 0,002770  | 5,77  |
| PKLR        | -4,671 | -1,087  | -6,31  | 0,00000 | 0,002770  | 5,666 |
| NTSR1       | 5,28   | -1,476  | 6,193  | 0,00000 | 0,003060  | 5,395 |
| CYP4F2      | -4,003 | 1,195   | -5,528 | 0,00001 | 0,016400  | 3,813 |
| PRSS2       | 5,756  | 0,743   | 5,444  | 0,00001 | 0,016600  | 3,609 |
| SLC26A9     | 4,647  | -1,826  | 5,421  | 0,00001 | 0,016600  | 3,554 |
| LINC02441   | -4,795 | -0,288  | -5,309 | 0,00001 | 0,019300  | 3,283 |
| TBR1        | 4,208  | -3,69   | 5,289  | 0,00001 | 0,019300  | 3,235 |
| AC097478.2  | 3,278  | -5,027  | 5,193  | 0,00001 | 0,022900  | 3,003 |
| KIF19       | 3,999  | 0,605   | 5,131  | 0,00002 | 0,023400  | 2,851 |
| SLC13A2     | -4,595 | 1,266   | -5,127 | 0,00002 | 0,023400  | 2,842 |
| TCN1        | 4,907  | 2,635   | 5,054  | 0,00002 | 0,026600  | 2,666 |
| MSMB        | 4,308  | -3,363  | 4,955  | 0,00003 | 0,032900  | 2,424 |
| LINC01413   | 3,814  | -5,235  | 4,899  | 0,00003 | 0,034100  | 2,289 |
| ACE2        | -3,267 | 4,819   | -4,895 | 0,00003 | 0,034100  | 2,278 |
| LDLRAD1     | 3,64   | -1,811  | 4,869  | 0,00003 | 0,034100  | 2,216 |
| C8orf37-AS1 | 2,765  | -5,127  | 4,844  | 0,00004 | 0,034100  | 2,154 |
| CELP        | -3,05  | 1,817   | -4,84  | 0,00004 | 0,034100  | 2,144 |
| HRASLS5     | 3,754  | -1,146  | 4,693  | 0,00006 | 0,049100  | 1,787 |
| AC034229.3  | -3,344 | -4,197  | -4,637 | 0,00007 | 0,054800  | 1,652 |
| ROPN1L      | 2,712  | -2,813  | 4,616  | 0,00007 | 0,055600  | 1,601 |
| PLXNB3      | 3,68   | 1,785   | 4,586  | 0,00008 | 0,057900  | 1,526 |
| GRIP2       | 2,796  | 1,202   | 4,563  | 0,00008 | 0,057900  | 1,473 |
| ARMC4       | 2,986  | -1,629  | 4,551  | 0,00008 | 0,057900  | 1,442 |
| DUSP4       | 2,764  | 4,099   | 4,544  | 0,00009 | 0,057900  | 1,426 |
| AC106772.2  | -2,994 | -4,959  | -4,524 | 0,00009 | 0,059200  | 1,376 |
| TNMD        | -3,205 | -1,405  | -4,507 | 0,00009 | 0,059900  | 1,336 |
| HAVCR1      | -3,769 | 0,413   | -4,409 | 0,00012 | 0,076100  | 1,099 |
| HS3ST5      | 3,718  | -2,673  | 4,366  | 0,00014 | 0,080700  | 0,994 |
| C16orf54    | 3,036  | 1,156   | 4,365  | 0,00014 | 0,080700  | 0,991 |
| KLK11       | 3,457  | 1,548   | 4,341  | 0,00015 | 0,081900  | 0,934 |
| DDIT4L      | 3,401  | -0,774  | 4,32   | 0,00016 | 0,081900  | 0,884 |
| UGT2B17     | -7,3   | 1,571   | -4,31  | 0,00016 | 0,081900  | 0,859 |
| ARX         | 3,749  | -3,318  | 4,309  | 0,00016 | 0,081900  | 0,857 |
| ULK4P1      | 3,357  | -3,238  | 4,307  | 0,00016 | 0,081900  | 0,853 |

|            |        |        |        |         |          |       |
|------------|--------|--------|--------|---------|----------|-------|
| AQP12A     | -3,424 | -3,081 | -4,286 | 0,00017 | 0,083800 | 0,803 |
| CAPN13     | -3,278 | 2,165  | -4,28  | 0,00018 | 0,083800 | 0,787 |
| FABP1      | -4,724 | 7,552  | -4,261 | 0,00019 | 0,083900 | 0,742 |
| CCDC181    | 3,303  | -3,274 | 4,252  | 0,00019 | 0,083900 | 0,721 |
| AC004947.1 | 3,817  | -3,246 | 4,244  | 0,00020 | 0,083900 | 0,7   |
| LINC01589  | 2,706  | -4,566 | 4,238  | 0,00020 | 0,083900 | 0,686 |
| SCG2       | 3,005  | 2,233  | 4,236  | 0,00020 | 0,083900 | 0,681 |
| FZD9       | 2,874  | -1,365 | 4,224  | 0,00021 | 0,083900 | 0,653 |
| HAND1      | 4,081  | -3,397 | 4,216  | 0,00021 | 0,083900 | 0,634 |
| LINC02084  | 2,879  | -3,231 | 4,212  | 0,00021 | 0,083900 | 0,625 |
| NBPF5P     | 3,251  | -4,294 | 4,187  | 0,00023 | 0,086400 | 0,564 |
| CYP2B6     | -3,619 | 3,455  | -4,186 | 0,00023 | 0,086400 | 0,562 |
| AC019257.2 | -2,658 | -3,617 | -4,161 | 0,00025 | 0,089600 | 0,502 |
| CECR3      | -3,074 | -4,065 | -4,158 | 0,00025 | 0,089600 | 0,494 |
| AC004233.1 | -2,774 | -4,576 | -4,14  | 0,00026 | 0,089600 | 0,452 |
| AC093585.1 | -3,006 | -4,035 | -4,138 | 0,00026 | 0,089600 | 0,447 |
| PDE10A     | 2,725  | 2,295  | 4,133  | 0,00027 | 0,089600 | 0,434 |
| BMPR1B     | 3,186  | -0,21  | 4,132  | 0,00027 | 0,089600 | 0,431 |
| TTC29      | 2,769  | -4,038 | 4,12   | 0,00028 | 0,091000 | 0,402 |
| AC097478.3 | 2,917  | -5,534 | 4,093  | 0,00030 | 0,095200 | 0,337 |
| AC007614.3 | -3,007 | -2,851 | -4,084 | 0,00031 | 0,095200 | 0,318 |
| CLEC18B    | 2,85   | -1,124 | 4,084  | 0,00031 | 0,095200 | 0,316 |
| PRKCG      | 3,19   | -0,338 | 4,078  | 0,00031 | 0,095200 | 0,303 |
| CTSG       | 3,181  | -0,738 | 4,058  | 0,00033 | 0,098900 | 0,255 |
